# Supplementary material
Source: Springer Nature journal article supplement (https://www.springermedizin.de/resource/supplementary/12904_2008_45_MOESM2_ESM.pdf/9517980)
Supplement: MOESM2 [file 9517980]

Additional file 2: Adequacy of included studies

| Reference                                                                                                                          | Included studies                                                 | Max number of patients | Quality of studies                                                                                                                                  | Exclusion/sensitivity analysis for poor quality                               |
|------------------------------------------------------------------------------------------------------------------------------------|------------------------------------------------------------------|------------------------|-----------------------------------------------------------------------------------------------------------------------------------------------------|-------------------------------------------------------------------------------|
| <b>Nicholson (2007;i4)</b><br>Methadone for cancer pain                                                                            | 9 trials: all R, C, and 6 DB                                     | 459                    | Oxford Quality Scale<br>QS2=3<br>QS3=2<br>QS4=3<br>QS5=1<br>Allocation Concealment A=3, B=3, C=3                                                    | No                                                                            |
| <b>Wiffen (2007;i4)</b><br>Oral morphine for cancer pain                                                                           | 54 trials: all R, C and 37 DB<br>Max 17 trials in any comparison | 3749                   | Oxford Quality Scale<br>QS1=7<br>QS2=11<br>QS3=6<br>QS4=18<br>QS5=12                                                                                | Sensitivity analysis planned for low quality, but insuff data.                |
| <b>Dewey (2007;i1)</b><br>Eicosapentaenoic acid (EPA, an omega-3 fatty acid from fish oils) for the treatment of cancer cachexia   | 5 trials: all R, C, 3 DB                                         | 587                    | Oxford Quality Scale<br>QS2=1<br>QS3=1<br>QS5=3<br>Allocation Concealment A=1, B=1, C=1                                                             | No                                                                            |
| <b>Miles (2006;i4)</b><br>Laxatives for the management of constipation in palliative care patients                                 | 4 trials: all R, open                                            | 280                    | Oxford Quality Scale and Rinck Scale 1997<br>QS2 + RS3<br>QS3 + RS3.5<br>QS2 + RS2<br>QS3 + RS4<br>Allocation Concealment C=1, D=3                  | No                                                                            |
| <b>Dennert (2006;i3)</b><br>Selenium for alleviating the side effects of chemotherapy, radiotherapy and surgery in cancer patients | 2 trials: both R, C (one presenting preliminary results)         | 123                    | Oxford Quality Scale<br>QS3=1<br>Other trial pending<br>Allocation Concealment B=1<br>Pending trial Allocation Concealment A=1                      | No                                                                            |
| <b>Martinez-Zapata (2006;i3)</b><br>Calcitonin for metastatic bone pain                                                            | 2 trials: both R, C                                              | 90                     | Oxford Quality Scale and Oxford Pain Validity Score<br>QS4 + OPVS16<br>QS3 + OPVS13<br>Allocation Concealment both B                                | No low quality trials                                                         |
| <b>Tsao (2006;i3)</b><br>Whole brain radiotherapy for the treatment of multiple brain metastases                                   | 24 trials: various designs, not all full publications            | 6353                   | Oxford Quality Scale and Detsky score<br>QS1=6<br>QS2=8<br>QS3=6<br>DS 8 to 11=19<br>DS 3=1<br>4 trials not full publications and not scored        | Sensitivity analysis for low quality                                          |
| <b>Ezzo (2006;i2)</b><br>Acupuncture-point stimulation for chemotherapy-induced nausea or vomiting                                 | 11 trials: all R, C                                              | 1247                   | Table:<br>Randomisation/concealment adequate/sham control/asses'r blind stated/dropouts accounted for<br>Allocation Concealment, A=4, B=3, C=3, D=1 | Sensitivity analysis for allocation concealment and sham vs non sham controls |

|                                                                                                                                                        |                                                                                                                    |                                                                             |                                                                                                                                      |                                                                 |
|--------------------------------------------------------------------------------------------------------------------------------------------------------|--------------------------------------------------------------------------------------------------------------------|-----------------------------------------------------------------------------|--------------------------------------------------------------------------------------------------------------------------------------|-----------------------------------------------------------------|
| <b>Zeppetella (2006;i1)</b><br>Opioids for the management of breakthrough (episodic) pain in cancer patients                                           | 4 trials: all R, C                                                                                                 | 393                                                                         | Oxford Quality Scale<br>QS4= 2<br>QS5= 2<br>Allocation Concealment A=2, B=2                                                          | All trials of high quality                                      |
| <b>Berenstein (2005;i2)</b><br>Megestrol acetate for the treatment of anorexia-cachexia syndrome                                                       | 30 trials: all R, C                                                                                                | 4123<br>Only 50% contributed to analysis                                    | Oxford Quality Scale<br>QS3 to 5=20<br>QS<3=10<br>Allocation Concealment A=11, B =19, D=1                                            | Sensitivity analysis for low quality                            |
| <b>Ahmed (200; i1)</b><br>Supportive care for C patients with gastrointestinal cancer                                                                  | 4 trials: all R, C                                                                                                 | 483                                                                         | Oxford Quality Scale and Rinck Scale<br>QS2 + RS5<br>QS3 + RS4.5<br>QS3 + RS5.0<br>QS3 + RS5.5<br>Allocation Concealment A=1, D=3    | Blinding not possible, trials of moderate quality, all included |
| <b>Ballantyne (2005;i1)</b><br>Comparative efficacy of epidural, subarachnoid, and intracerebroventricular opioids in patients with pain due to cancer | No controlled trials<br>72 uncontrolled trials                                                                     | 2402                                                                        | None                                                                                                                                 | No                                                              |
| <b>McNicol (2005;i1)</b><br>NSAIDs or paracetamol, alone or combined with opioids, for cancer pain                                                     | 42: all R, C                                                                                                       | 3084                                                                        | Oxford Quality Scale<br>QS1=2<br>QS2=7<br>QS3=22<br>QS4=9<br>QS5=2<br>Allocation Concealment A=1, B=36, D=5                          | not used for weighting                                          |
| <b>Shaw (2005;i1)</b><br>Pleurodesis for malignant pleural effusions                                                                                   | 36 trials: all R, all open                                                                                         | 1499                                                                        | Cochrane Reviewers Handbook<br>1=5<br>2=1<br>3=5<br>4=11<br>5=10<br>6=1<br>(3 trials not scored)<br>Allocation Concealment A=5, B=31 | No                                                              |
| <b>Fellowes (2004;i3)</b><br>Aromatherapy and massage for symptom relief in patients with cancer                                                       | 8 trials: all R, C                                                                                                 | 357                                                                         | Informed by criteria in Oxford Quality Scale. No numerical scoring                                                                   | No                                                              |
| <b>Quigley (2004;i3)</b><br>Opioid switching to improve pain relief and drug tolerability                                                              | No RCTs<br>52 reports: case reports (23), retrospective studies/audits (15), prospective uncontrolled studies (14) | Not clear<br>Prospective and retrospective studies ±2000<br>Case reports 55 | No RCTs met inclusion criteria                                                                                                       | No                                                              |

|                                                                                                                                                    |                                                                                                              |              |                                                                                                                                                                       |                                                                                        |
|----------------------------------------------------------------------------------------------------------------------------------------------------|--------------------------------------------------------------------------------------------------------------|--------------|-----------------------------------------------------------------------------------------------------------------------------------------------------------------------|----------------------------------------------------------------------------------------|
| <b>Jackson (2004;i2)</b><br>Drug therapy for delirium in terminally ill patients                                                                   | 1 trial: R, DB                                                                                               | 30           | Oxford Quality Scale<br>QS5=1<br>Allocation Concealment A=1                                                                                                           | Single trial high quality                                                              |
| <b>Jackson (2004;i1)</b><br>Drug therapy for anxiety in palliative care                                                                            | None                                                                                                         | 0            | No RCTs met inclusion criteria                                                                                                                                        |                                                                                        |
| <b>Roqué (200; i4)</b><br>Radioisotopes for metastatic bone pain                                                                                   | 4 trials: all R, DB, PC                                                                                      | 325          | Oxford Quality Scale and Oxford Pain Validity Score<br>QS3 + OPVS5<br>QS5 + OPVS13<br>QS4 + OPVS12<br>QS4 + OPVS15<br>Allocation Concealment A=1, B=3                 | Sensitivity analysis for low quality                                                   |
| <b>Bell (2003;i3)</b><br>Ketamine as an adjuvant to opioids for cancer pain                                                                        | 2 trials: both R, DB, cross-over, adjuvant therapy.<br>32 case reports or uncontrolled studies also reviewed | 30           | Oxford Quality Scale and Oxford Pain Validity Score<br>QS3 + OPVS12<br>QS3 + OPVS13<br>Allocation Concealment both B                                                  | Yes                                                                                    |
| <b>Hirst (2002;i4)</b><br>Benzodiazepines and related drugs for insomnia in palliative care                                                        | None                                                                                                         | 0            | No RCTs met inclusion criteria                                                                                                                                        |                                                                                        |
| <b>Wong (2002;i2)</b><br>Bisphosphonates for the relief of pain secondary to bone metastases                                                       | 30 trials: all R, 21 DB and PC, 4 open, 5 active (dose response)                                             | 3582         | Oxford Quality Scale<br>QS1=2<br>QS2=8<br>QS3=7<br>QS4=9<br>QS5=4                                                                                                     | Sensitivity analysis for low quality                                                   |
| <b>Jennings (2001;i3)</b><br>Opioids for the palliation of breathlessness in terminal illness                                                      | 18 trials: all R, DB, PC, cross-over                                                                         | 292          | Oxford Quality Scale<br>QS3=2<br>QS4=6<br>Allocation Concealment all B                                                                                                | Trials all adequate quality                                                            |
| <b>Feuer (1999;i3)</b><br>Corticosteroids for the resolution of malignant bowel obstruction in advanced gynaecological and gastrointestinal cancer | 3 trials: all R, DB, PC<br>[7 pro- and retrospective studies were uncontrolled and not included in analysis] | 89 in trials | Quality scores (from the NHS criteria)<br>3 included trials: Grade IA<br>7 other studies:<br>IIC = 1<br>IIIC = 6<br>Allocation Concealment A=3 (included trials), D=7 | Sensitivity analysis for missing data, assuming best and worst possible scenarios      |
| <b>McQuay (1999;i3)</b><br>Radiotherapy for the palliation of painful bone metastases                                                              | 20 trials: all R, C (blinding often not possible)                                                            | 3060         | Oxford Quality Scale<br>QS1=2<br>QS2=11<br>QS3=5<br>QS4=1<br>QS5=1<br>Allocation Concealment A=4, B=1, D=15                                                           | Trials all adequate quality, given difficulty of blinding and use of placebo unethical |

R=randomised; DB=double blind; C=controlled; PC=placebo controlled
